# Supplementary material
Source: publisher figshare collection journal article supplement (https://acs.figshare.com/ndownloader/files/4563475)
Supplement: Supplementary file 1 [file 4563475]

 
data_max33
 
_audit_creation_method            SHELXL-97
_chemical_name_systematic
;
 ?
;
_chemical_name_common             ?
_chemical_melting_point           ?
_chemical_formula_moiety          ?
_chemical_formula_sum
 'C15 H20 Cu N2 O9'
_chemical_formula_weight          435.87
 
loop_
 _atom_type_symbol
 _atom_type_description
 _atom_type_scat_dispersion_real
 _atom_type_scat_dispersion_imag
 _atom_type_scat_source
 'C'  'C'   0.0033   0.0016
 'International Tables Vol C Tables 4.2.6.8 and 6.1.1.4'
 'H'  'H'   0.0000   0.0000
 'International Tables Vol C Tables 4.2.6.8 and 6.1.1.4'
 'Cu'  'Cu'   0.3201   1.2651
 'International Tables Vol C Tables 4.2.6.8 and 6.1.1.4'
 'N'  'N'   0.0061   0.0033
 'International Tables Vol C Tables 4.2.6.8 and 6.1.1.4'
 'O'  'O'   0.0106   0.0060
 'International Tables Vol C Tables 4.2.6.8 and 6.1.1.4'
 
_symmetry_cell_setting            Tetragonal
_symmetry_space_group_name_H-M    P4nc
 
loop_
 _symmetry_equiv_pos_as_xyz
 'x, y, z'
 '-x+1/2, y+1/2, z+1/2'
 '-x, -y, z'
 'x+1/2, -y+1/2, z+1/2'
 '-y+1/2, -x+1/2, z+1/2'
 'y, -x, z'
 '-y, x, z'
 'y+1/2, x+1/2, z+1/2'
 
_cell_length_a                    17.3525(6)
_cell_length_b                    17.3525(6)
_cell_length_c                    14.7188(5)
_cell_angle_alpha                 90.00
_cell_angle_beta                  90.00
_cell_angle_gamma                 90.00
_cell_volume                      4432.0(3)
_cell_formula_units_Z             8
_cell_measurement_temperature     293(2)
_cell_measurement_reflns_used     37494
_cell_measurement_theta_min       1.66
_cell_measurement_theta_max       29.98
 
_exptl_crystal_description        prism
_exptl_crystal_colour             blue
_exptl_crystal_size_max           0.7
_exptl_crystal_size_mid           0.3
_exptl_crystal_size_min           0.2
_exptl_crystal_density_meas       'not measured'
_exptl_crystal_density_diffrn     1.306
_exptl_crystal_density_method     'not measured'
_exptl_crystal_F_000              1800
_exptl_absorpt_coefficient_mu     1.028
_exptl_absorpt_correction_type    multi-scan
_exptl_absorpt_correction_T_min   0.6431
_exptl_absorpt_correction_T_max   0.7135
_exptl_absorpt_process_details    ?
 
_exptl_special_details
;
 ?
;
 
_diffrn_ambient_temperature       293(2)
_diffrn_radiation_wavelength      0.71073
_diffrn_radiation_type            MoK\a
_diffrn_radiation_source          'fine-focus sealed tube'
_diffrn_radiation_monochromator   graphite
_diffrn_measurement_device_type   'STOE-IPDS II'
_diffrn_measurement_method        'omega scans'
_diffrn_detector_area_resol_mean  ?
_diffrn_standards_number          ?
_diffrn_standards_interval_count  ?
_diffrn_standards_interval_time   ?
_diffrn_standards_decay_%         ?
_diffrn_reflns_number             35319
_diffrn_reflns_av_R_equivalents   0.0468
_diffrn_reflns_av_sigmaI/netI     0.0353
_diffrn_reflns_limit_h_min        -23
_diffrn_reflns_limit_h_max        23
_diffrn_reflns_limit_k_min        -20
_diffrn_reflns_limit_k_max        23
_diffrn_reflns_limit_l_min        -18
_diffrn_reflns_limit_l_max        20
_diffrn_reflns_theta_min          2.62
_diffrn_reflns_theta_max          29.30
_reflns_number_total              5791
_reflns_number_gt                 4789
_reflns_threshold_expression      >2sigma(I)
 
_computing_data_collection        'X-Area'
_computing_cell_refinement        'X-Area'
_computing_data_reduction         'X-Area'
_computing_structure_solution     'SHELXS-97 (Sheldrick, 1997)'
_computing_structure_refinement   'SHELXL-97 (Sheldrick, 1997)'
_computing_molecular_graphics     ?
_computing_publication_material   ?
 
_refine_special_details
;
 Refinement of F^2^ against ALL reflections.  The weighted R-factor wR and
 goodness of fit S are based on F^2^, conventional R-factors R are based
 on F, with F set to zero for negative F^2^. The threshold expression of
 F^2^ > 2sigma(F^2^) is used only for calculating R-factors(gt) etc. and is
 not relevant to the choice of reflections for refinement.  R-factors based
 on F^2^ are statistically about twice as large as those based on F, and R-
 factors based on ALL data will be even larger.
;
 
_refine_ls_structure_factor_coef  Fsqd
_refine_ls_matrix_type            full
_refine_ls_weighting_scheme       calc
_refine_ls_weighting_details
 'calc w=1/[\s^2^(Fo^2^)+(0.0743P)^2^+0.3862P] where P=(Fo^2^+2Fc^2^)/3'
_atom_sites_solution_primary      direct
_atom_sites_solution_secondary    difmap
_atom_sites_solution_hydrogens    geom
_refine_ls_hydrogen_treatment     constr
_refine_ls_extinction_method      none
_refine_ls_extinction_coef        ?
_refine_ls_abs_structure_details
 'Flack H D (1983), Acta Cryst. A39, 876-881'
_refine_ls_abs_structure_Flack    0.039(18)
_refine_ls_number_reflns          5791
_refine_ls_number_parameters      244
_refine_ls_number_restraints      1
_refine_ls_R_factor_all           0.0655
_refine_ls_R_factor_gt            0.0511
_refine_ls_wR_factor_ref          0.1255
_refine_ls_wR_factor_gt           0.1193
_refine_ls_goodness_of_fit_ref    1.045
_refine_ls_restrained_S_all       1.045
_refine_ls_shift/su_max           0.009
_refine_ls_shift/su_mean          0.001
 
loop_
 _atom_site_label
 _atom_site_type_symbol
 _atom_site_fract_x
 _atom_site_fract_y
 _atom_site_fract_z
 _atom_site_U_iso_or_equiv
 _atom_site_adp_type
 _atom_site_occupancy
 _atom_site_symmetry_multiplicity
 _atom_site_calc_flag
 _atom_site_refinement_flags
 _atom_site_disorder_assembly
 _atom_site_disorder_group
C1 C 1.3278(2) -0.03850(19) -0.6655(3) 0.0350(7) Uani 1 1 d . . .
C2 C 1.33448(18) 0.03673(19) -0.7155(2) 0.0325(6) Uani 1 1 d . . .
C3 C 1.3861(2) 0.0447(2) -0.7869(2) 0.0315(7) Uani 1 1 d . . .
H3A H 1.4148 0.0025 -0.8063 0.038 Uiso 1 1 calc R . .
C4 C 1.39483(18) 0.11632(18) -0.8298(2) 0.0315(7) Uani 1 1 d . . .
C5 C 1.4515(2) 0.1266(2) -0.9022(3) 0.0356(8) Uani 1 1 d . . .
C6 C 1.35319(19) 0.1791(2) -0.7978(3) 0.0351(7) Uani 1 1 d . . .
H6 H 1.3593 0.2270 -0.8253 0.042 Uiso 1 1 calc R . .
C7 C 1.3022(2) 0.17135(18) -0.7246(2) 0.0336(7) Uani 1 1 d . . .
C8 C 1.29271(19) 0.10010(19) -0.6853(2) 0.0339(6) Uani 1 1 d . . .
H8 H 1.2578 0.0942 -0.6378 0.041 Uiso 1 1 calc R . .
C9 C 1.2617(2) 0.2414(2) -0.6885(2) 0.0388(7) Uani 1 1 d . . .
C10 C 1.4850(3) -0.2323(4) -0.6658(5) 0.088(2) Uani 1 1 d . . .
H10A H 1.4769 -0.2046 -0.7215 0.132 Uiso 1 1 calc R . .
H10B H 1.4582 -0.2807 -0.6684 0.132 Uiso 1 1 calc R . .
H10C H 1.5391 -0.2414 -0.6576 0.132 Uiso 1 1 calc R . .
C11 C 1.4950(3) -0.1116(3) -0.5863(5) 0.0775(18) Uani 1 1 d . . .
H11A H 1.4873 -0.0856 -0.6432 0.116 Uiso 1 1 calc R . .
H11B H 1.5491 -0.1202 -0.5771 0.116 Uiso 1 1 calc R . .
H11C H 1.4751 -0.0805 -0.5378 0.116 Uiso 1 1 calc R . .
C12 C 1.4627(4) -0.2277(6) -0.5030(5) 0.114(3) Uani 1 1 d . . .
H12A H 1.4691 -0.2818 -0.5177 0.136 Uiso 1 1 calc R . .
H12B H 1.5099 -0.2107 -0.4739 0.136 Uiso 1 1 calc R . .
C13 C 1.4047(4) -0.2217(6) -0.4414(5) 0.118(3) Uani 1 1 d . . .
H13A H 1.4109 -0.1738 -0.4082 0.142 Uiso 1 1 calc R . .
H13B H 1.4093 -0.2636 -0.3982 0.142 Uiso 1 1 calc R . .
C14 C 1.2768(5) -0.1731(4) -0.4274(4) 0.092(2) Uani 1 1 d . . .
H14A H 1.2262 -0.1743 -0.4535 0.138 Uiso 1 1 calc R . .
H14B H 1.2962 -0.1213 -0.4287 0.138 Uiso 1 1 calc R . .
H14C H 1.2745 -0.1908 -0.3657 0.138 Uiso 1 1 calc R . .
C15 C 1.2945(4) -0.3018(3) -0.4789(4) 0.0722(15) Uani 1 1 d . . .
H15A H 1.2451 -0.3008 -0.5083 0.108 Uiso 1 1 calc R . .
H15B H 1.2883 -0.3187 -0.4172 0.108 Uiso 1 1 calc R . .
H15C H 1.3280 -0.3367 -0.5106 0.108 Uiso 1 1 calc R . .
Cu1 Cu 1.339022(19) -0.177445(19) -0.60567(4) 0.03486(11) Uani 1 1 d . . .
N1 N 1.45480(18) -0.1856(2) -0.5877(3) 0.0528(9) Uani 1 1 d . . .
N2 N 1.3284(2) -0.2234(2) -0.4799(3) 0.0549(9) Uani 1 1 d . . .
O1 O 1.34983(16) -0.09982(14) -0.70514(19) 0.0434(6) Uani 1 1 d . . .
O2 O 1.30312(17) -0.03922(15) -0.58599(16) 0.0450(6) Uani 1 1 d . . .
O3 O 1.43442(18) 0.18215(18) -0.9602(2) 0.0576(8) Uani 1 1 d . . .
H3 H 1.4679 0.1846 -0.9994 0.086 Uiso 1 1 calc R . .
O4 O 1.50907(19) 0.0879(2) -0.9098(3) 0.0703(10) Uani 1 1 d . . .
O5 O 1.28772(19) 0.30663(15) -0.7044(2) 0.0514(7) Uani 1 1 d . . .
O6 O 1.23103(14) -0.20218(15) -0.63959(18) 0.0436(6) Uani 1 1 d . . .
O11W O 1.1308(10) -0.0835(8) -0.688(3) 0.69(3) Uani 1 1 d . . .
O12W O 1.1352(10) 0.0190(15) -0.814(5) 0.86(5) Uani 1 1 d . . .
O13W O 1.4183(10) 0.4028(10) -0.745(2) 0.60(3) Uani 1 1 d . . .
 
loop_
 _atom_site_aniso_label
 _atom_site_aniso_U_11
 _atom_site_aniso_U_22
 _atom_site_aniso_U_33
 _atom_site_aniso_U_23
 _atom_site_aniso_U_13
 _atom_site_aniso_U_12
C1 0.0416(18) 0.0337(16) 0.0296(18) -0.0040(13) -0.0009(14) -0.0075(12)
C2 0.0344(15) 0.0368(15) 0.0263(16) -0.0019(13) -0.0031(12) -0.0010(12)
C3 0.0357(17) 0.0369(17) 0.0221(16) -0.0045(13) -0.0038(13) 0.0034(13)
C4 0.0320(15) 0.0367(16) 0.0257(16) -0.0024(12) -0.0021(12) -0.0003(11)
C5 0.0401(19) 0.0373(18) 0.0293(19) -0.0047(14) 0.0041(14) 0.0002(14)
C6 0.0356(15) 0.0382(16) 0.0316(18) 0.0030(13) 0.0010(12) 0.0059(12)
C7 0.0358(15) 0.0348(15) 0.0303(18) -0.0005(12) -0.0010(13) 0.0074(11)
C8 0.0345(15) 0.0410(17) 0.0262(17) 0.0004(13) -0.0009(12) 0.0016(12)
C9 0.0393(16) 0.0465(18) 0.0305(17) 0.0000(15) -0.0014(14) 0.0114(14)
C10 0.050(3) 0.085(4) 0.130(6) -0.032(4) 0.024(3) -0.003(3)
C11 0.045(2) 0.081(3) 0.106(5) -0.021(3) 0.004(3) -0.024(2)
C12 0.057(4) 0.198(9) 0.085(5) 0.054(5) -0.011(3) 0.014(4)
C13 0.075(4) 0.221(9) 0.059(4) 0.053(5) -0.020(3) -0.026(5)
C14 0.147(6) 0.083(4) 0.047(3) -0.009(3) 0.040(4) -0.022(4)
C15 0.103(4) 0.057(3) 0.057(3) 0.017(2) 0.020(3) -0.018(3)
Cu1 0.03862(18) 0.03693(18) 0.02903(18) -0.0012(3) 0.0045(3) -0.00976(12)
N1 0.0418(15) 0.0609(18) 0.056(3) 0.0015(17) 0.0054(15) -0.0065(13)
N2 0.061(2) 0.068(2) 0.036(2) 0.0089(16) 0.0052(15) -0.0221(17)
O1 0.0632(15) 0.0321(11) 0.0348(14) -0.0032(10) 0.0092(12) -0.0026(10)
O2 0.0687(16) 0.0422(12) 0.0241(15) -0.0026(10) 0.0037(11) -0.0082(11)
O3 0.0612(18) 0.0692(19) 0.0423(17) 0.0204(14) 0.0182(14) 0.0191(15)
O4 0.0604(19) 0.071(2) 0.079(2) 0.0284(18) 0.0322(17) 0.0263(16)
O5 0.0650(19) 0.0390(14) 0.0503(17) -0.0025(13) 0.0191(15) 0.0058(12)
O6 0.0417(13) 0.0443(13) 0.0449(15) -0.0117(11) 0.0002(10) -0.0114(10)
O11W 0.326(18) 0.178(11) 1.57(9) 0.10(3) -0.50(4) 0.017(12)
O12W 0.198(14) 0.38(3) 2.00(14) -0.24(6) -0.24(4) -0.010(18)
O13W 0.310(18) 0.296(18) 1.20(7) 0.32(3) 0.40(3) 0.058(16)
 
_geom_special_details
;
 All esds (except the esd in the dihedral angle between two l.s. planes)
 are estimated using the full covariance matrix.  The cell esds are taken
 into account individually in the estimation of esds in distances, angles
 and torsion angles; correlations between esds in cell parameters are only
 used when they are defined by crystal symmetry.  An approximate (isotropic)
 treatment of cell esds is used for estimating esds involving l.s. planes.
;
 
loop_
 _geom_bond_atom_site_label_1
 _geom_bond_atom_site_label_2
 _geom_bond_distance
 _geom_bond_site_symmetry_2
 _geom_bond_publ_flag
C1 O2 1.245(5) . ?
C1 O1 1.273(4) . ?
C1 C2 1.503(5) . ?
C2 C3 1.387(5) . ?
C2 C8 1.390(5) . ?
C3 C4 1.403(5) . ?
C3 H3A 0.9300 . ?
C4 C6 1.390(4) . ?
C4 C5 1.461(5) . ?
C5 O4 1.209(5) . ?
C5 O3 1.322(5) . ?
C6 C7 1.401(5) . ?
C6 H6 0.9300 . ?
C7 C8 1.375(5) . ?
C7 C9 1.501(4) . ?
C8 H8 0.9300 . ?
C9 O5 1.241(5) . ?
C9 O6 1.272(4) 7_645 ?
C9 Cu1 2.548(3) 7_645 ?
C10 N1 1.501(7) . ?
C10 H10A 0.9600 . ?
C10 H10B 0.9600 . ?
C10 H10C 0.9600 . ?
C11 N1 1.462(6) . ?
C11 H11A 0.9600 . ?
C11 H11B 0.9600 . ?
C11 H11C 0.9600 . ?
C12 C13 1.359(10) . ?
C12 N1 1.451(8) . ?
C12 H12A 0.9700 . ?
C12 H12B 0.9700 . ?
C13 N2 1.440(7) . ?
C13 H13A 0.9700 . ?
C13 H13B 0.9700 . ?
C14 N2 1.470(8) . ?
C14 H14A 0.9600 . ?
C14 H14B 0.9600 . ?
C14 H14C 0.9600 . ?
C15 N2 1.482(6) . ?
C15 H15A 0.9600 . ?
C15 H15B 0.9600 . ?
C15 H15C 0.9600 . ?
Cu1 O6 1.986(2) . ?
Cu1 O1 1.998(3) . ?
Cu1 N2 2.025(4) . ?
Cu1 N1 2.031(3) . ?
Cu1 C9 2.548(3) 6_665 ?
O3 H3 0.8200 . ?
O6 C9 1.272(4) 6_665 ?
 
loop_
 _geom_angle_atom_site_label_1
 _geom_angle_atom_site_label_2
 _geom_angle_atom_site_label_3
 _geom_angle
 _geom_angle_site_symmetry_1
 _geom_angle_site_symmetry_3
 _geom_angle_publ_flag
O2 C1 O1 121.7(3) . . ?
O2 C1 C2 119.7(3) . . ?
O1 C1 C2 118.5(3) . . ?
C3 C2 C8 120.0(3) . . ?
C3 C2 C1 120.5(3) . . ?
C8 C2 C1 119.3(3) . . ?
C2 C3 C4 119.9(3) . . ?
C2 C3 H3A 120.0 . . ?
C4 C3 H3A 120.0 . . ?
C6 C4 C3 119.1(3) . . ?
C6 C4 C5 120.1(3) . . ?
C3 C4 C5 120.6(3) . . ?
O4 C5 O3 122.1(4) . . ?
O4 C5 C4 123.8(4) . . ?
O3 C5 C4 114.1(3) . . ?
C4 C6 C7 120.9(3) . . ?
C4 C6 H6 119.5 . . ?
C7 C6 H6 119.5 . . ?
C8 C7 C6 119.1(3) . . ?
C8 C7 C9 121.6(3) . . ?
C6 C7 C9 119.3(3) . . ?
C7 C8 C2 121.0(3) . . ?
C7 C8 H8 119.5 . . ?
C2 C8 H8 119.5 . . ?
O5 C9 O6 122.1(3) . 7_645 ?
O5 C9 C7 120.1(3) . . ?
O6 C9 C7 117.8(3) 7_645 . ?
O5 C9 Cu1 72.1(2) . 7_645 ?
O6 C9 Cu1 50.00(16) 7_645 7_645 ?
C7 C9 Cu1 167.5(3) . 7_645 ?
N1 C10 H10A 109.5 . . ?
N1 C10 H10B 109.5 . . ?
H10A C10 H10B 109.5 . . ?
N1 C10 H10C 109.5 . . ?
H10A C10 H10C 109.5 . . ?
H10B C10 H10C 109.5 . . ?
N1 C11 H11A 109.5 . . ?
N1 C11 H11B 109.5 . . ?
H11A C11 H11B 109.5 . . ?
N1 C11 H11C 109.5 . . ?
H11A C11 H11C 109.5 . . ?
H11B C11 H11C 109.5 . . ?
C13 C12 N1 117.7(6) . . ?
C13 C12 H12A 107.9 . . ?
N1 C12 H12A 107.9 . . ?
C13 C12 H12B 107.9 . . ?
N1 C12 H12B 107.9 . . ?
H12A C12 H12B 107.2 . . ?
C12 C13 N2 114.7(6) . . ?
C12 C13 H13A 108.6 . . ?
N2 C13 H13A 108.6 . . ?
C12 C13 H13B 108.6 . . ?
N2 C13 H13B 108.6 . . ?
H13A C13 H13B 107.6 . . ?
N2 C14 H14A 109.5 . . ?
N2 C14 H14B 109.5 . . ?
H14A C14 H14B 109.5 . . ?
N2 C14 H14C 109.5 . . ?
H14A C14 H14C 109.5 . . ?
H14B C14 H14C 109.5 . . ?
N2 C15 H15A 109.5 . . ?
N2 C15 H15B 109.5 . . ?
H15A C15 H15B 109.5 . . ?
N2 C15 H15C 109.5 . . ?
H15A C15 H15C 109.5 . . ?
H15B C15 H15C 109.5 . . ?
O6 Cu1 O1 92.87(12) . . ?
O6 Cu1 N2 93.36(13) . . ?
O1 Cu1 N2 160.79(14) . . ?
O6 Cu1 N1 161.94(13) . . ?
O1 Cu1 N1 92.84(14) . . ?
N2 Cu1 N1 86.77(16) . . ?
O6 Cu1 C9 29.37(11) . 6_665 ?
O1 Cu1 C9 95.67(11) . 6_665 ?
N2 Cu1 C9 98.66(13) . 6_665 ?
N1 Cu1 C9 132.82(14) . 6_665 ?
C12 N1 C11 112.6(5) . . ?
C12 N1 C10 110.7(5) . . ?
C11 N1 C10 108.5(4) . . ?
C12 N1 Cu1 103.9(3) . . ?
C11 N1 Cu1 114.4(3) . . ?
C10 N1 Cu1 106.4(3) . . ?
C13 N2 C14 109.9(6) . . ?
C13 N2 C15 112.4(6) . . ?
C14 N2 C15 107.4(4) . . ?
C13 N2 Cu1 105.5(3) . . ?
C14 N2 Cu1 107.6(3) . . ?
C15 N2 Cu1 114.0(3) . . ?
C1 O1 Cu1 101.5(2) . . ?
C5 O3 H3 109.5 . . ?
C9 O6 Cu1 100.6(2) 6_665 . ?
 
_diffrn_measured_fraction_theta_max    0.990
_diffrn_reflns_theta_full              29.30
_diffrn_measured_fraction_theta_full   0.990
_refine_diff_density_max    0.355
_refine_diff_density_min   -0.526
_refine_diff_density_rms    0.064
